# Supplementary material for: Psychological Interventions for Prenatal Anxiety in Latinas and Black Women: A Scoping Review and Recommendations
Source: PubMed Central journal article supplement (PMC8965279; doi:10.3389/fpsyt.2022.820343), 2022-03-15
Supplement: Image_1.pdf [file Image_1.pdf]

## Supplementary File: Search Terms

### **Psych Info:**

((prenatal OR antenatal OR pregnancy) AND (intervention OR treatment OR therapy) AND (anxiety) , AND (African-American OR Black OR Latino OR Hispanic OR minority))

33 results

### **CINAHL**

(prenatal OR antenatal OR pregnancy) AND (intervention OR treatment OR therapy) AND (anxiety), AND (African-American OR Black OR Latino(a) OR Hispanic OR minority)

Limiters - Published Date: 20170101-20211231

Expanders - Apply equivalent subjects

Search modes - Boolean/Phrase

29 results

### **Web of Science**

(TS= (prenatal OR antenatal OR pregnancy) AND TI= (intervention OR treatment OR therapy) AND TS=(anxiety) AND TS=(African-American OR Black OR Latino OR Hispanic OR minority))

14 results

### **ProQuest Dissertation and Theses AI:**

((prenatal OR antenatal OR pregnancy) AND (intervention OR treatment OR therapy) AND (anxiety) AND (African-American OR Black OR Latino OR Hispanic OR minority))

20 results

### **PubMed**

(prenatal OR antenatal OR pregnancy) [tiab] AND (intervention OR treatment OR therapy) [tiab] AND (anxiety)[tiab] AND (African-American OR Black OR Latino(a) OR Hispanic OR minority) [tiab]

101 articles
